# Supplementary material for: Molecular hydrogen stimulates the gene expression of transcriptional coactivator PGC-1α to enhance fatty acid metabolism
Source: PubMed Central journal article supplement (PMC5515010; doi:10.1038/npjamd.2016.8), 2016-04-28
Supplement: npjamd20168-s1.pdf [file npjamd20168-s1.pdf]

## Supplementary Figure S1

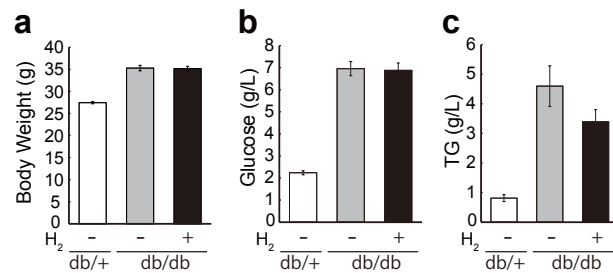

Supplementary Figure S1. Consumption of H<sub>2</sub>-water for 14 days shows no significant effects on body weight and the plasma levels of glucose and triglycerides.

(a) Body weights of *db/db* mice given water with or without hydrogen for 14 days were measured. Data are mean ± SEM (n = 9). *Db/+* mice were used as normal mouse controls. (b) Plasma concentrations of glucose and (c) triglycerides are shown as mean ± SEM (n = 9 for each *db/db* mice group and n=6 for *db/+* mice group).

Supplementary Figure S2

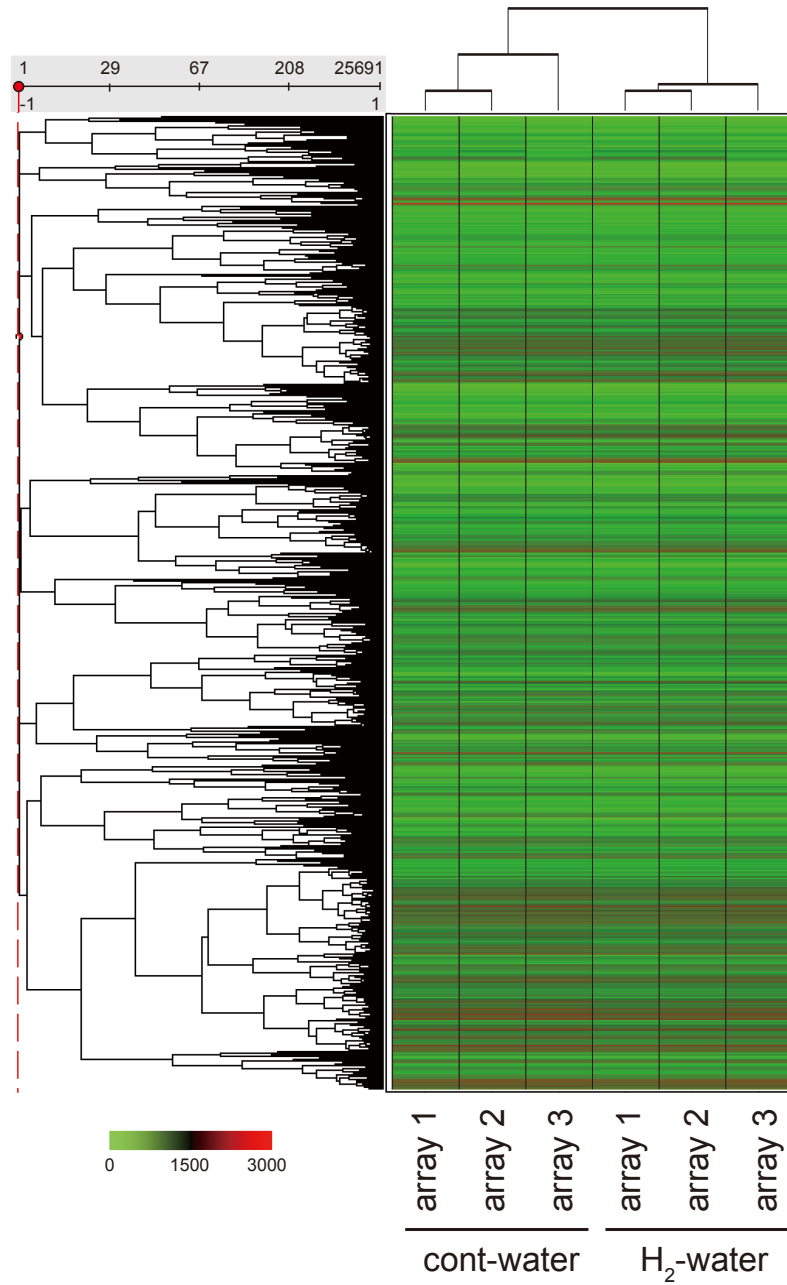

Supplementary Figure S2. Heat map representing the expression of hepatic genes of *db/db* mice given water with or without hydrogen for 14 days.

Colors represent expression levels of each gene.

### Supplementary Figure S3

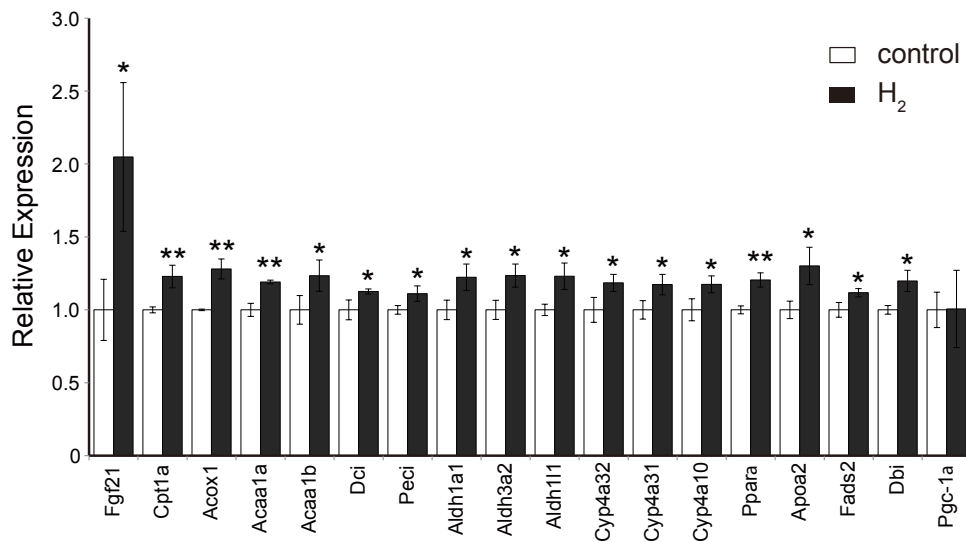

Supplementary Figure 3. Relative expression on DNA microarray of genes up-regulated by H<sub>2</sub>-water for 2 weeks.

*Db/db* mice were given water with or without H<sub>2</sub> for 2 weeks. Total RNA was prepared from the liver and DNA microarray analysis was performed. All microarray data were submitted to the KEGG (Kyoto Encyclopedia of Genes and Genomes) pathway analysis. Relative signal intensities of genes selected by the pathway analysis are shown. Data are mean  $\pm$  SD (n=3).





## Supplementary Figure S6

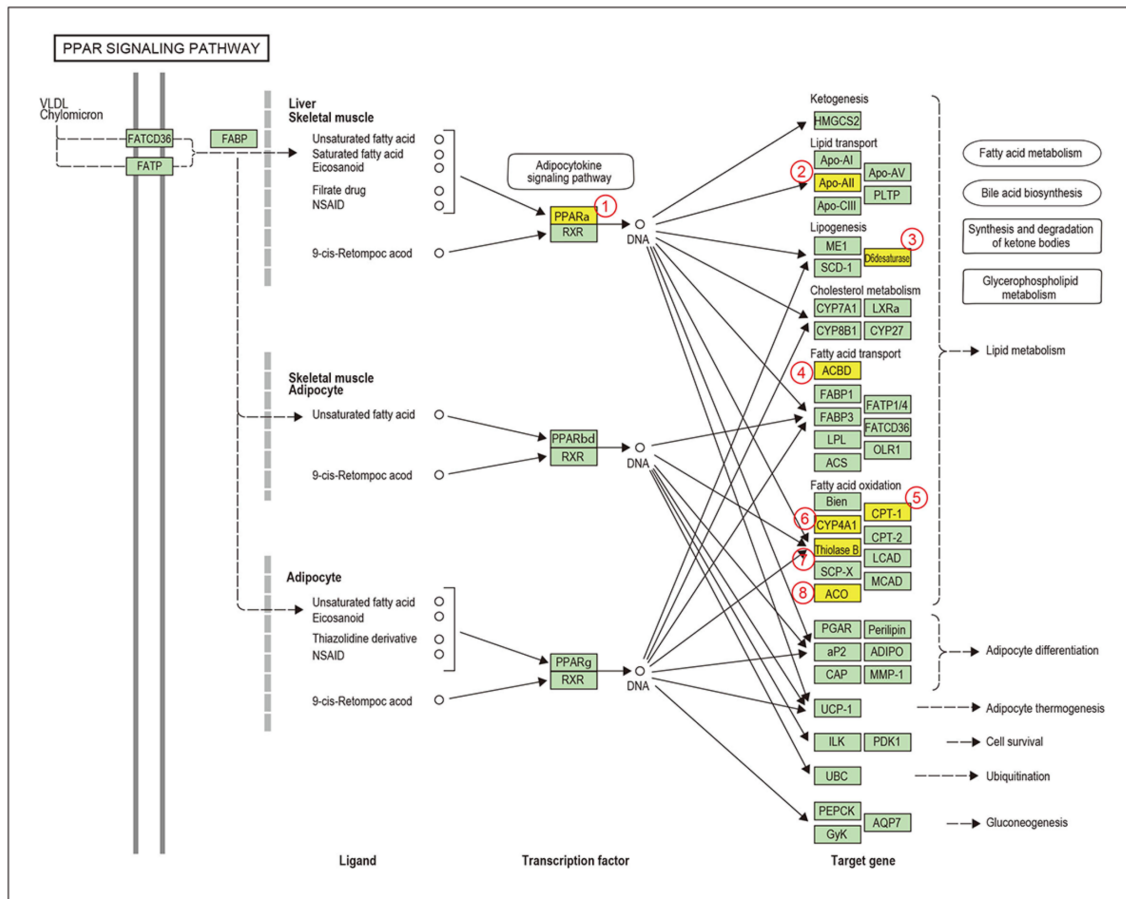

- ① peroxisome proliferator activated receptor alpha (Ppara)
- ② apolipoprotein A-II(Apoa2)
- ③ fatty acid desaturase 2 (Fads2)
- ④ diazepam binding inhibitor(Dbi)
- ⑤ carnitine palmitoyltransferase 1a, liver (Cpt1a)
- ⑥ cytochrome P450, family 4, subfamily a, polypeptide (Cyp4a32, Cyp4a10, Cyp4a31)
- ⑦ acetyl-coenzyme A acyltransferase(Acaa1a, Acaa1b)
- ⑧ acyl-coenzyme A oxidase 1, palmitoyl (Acox1)

Supplementary Figure S6. Hydrogen enhances the expression of a wide variety of PPAR signaling pathway-related genes.

Differentially expressed genes identified in the KEGG pathway database related to the PPAR signaling pathway are shown. Genes for which the expression was significantly increased by H<sub>2</sub>-water in the pathway are indicated in yellow.

Supplementary Figure S7

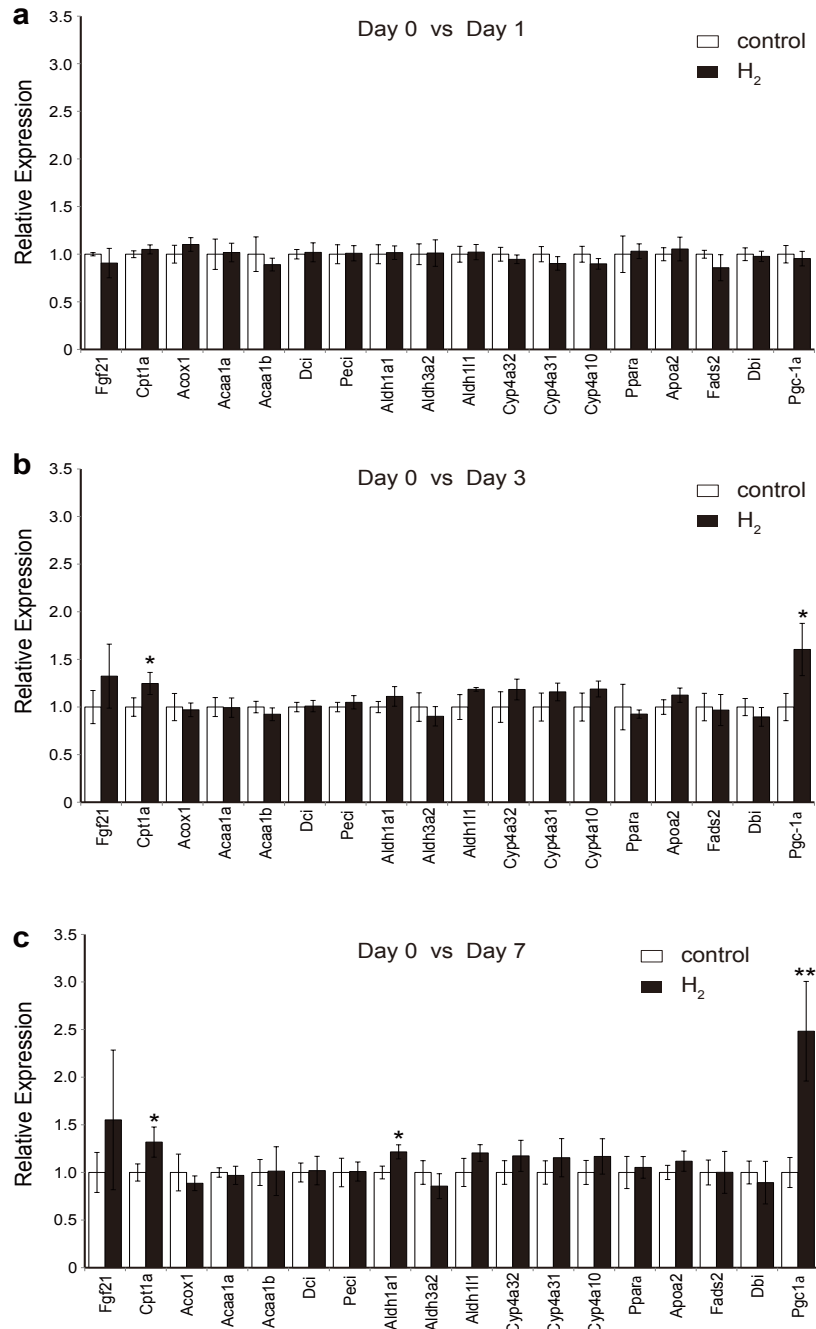

Supplementary Figure S7. Relative expression on DNA microarray of genes selected by the result of 2 weeks of consumption of H<sub>2</sub>-water.

*Db/db* mice were given 0.9 mg/kg MgH<sub>2</sub> for 0, 1, 3, and 7 days. Total RNA was prepared from the liver and DNA microarray analysis was performed. Relative signal intensities of genes selected by the result of 2 weeks of consumption of H<sub>2</sub>-water are shown. Data are mean ± SD (n=3).

Supplementary Figure S8

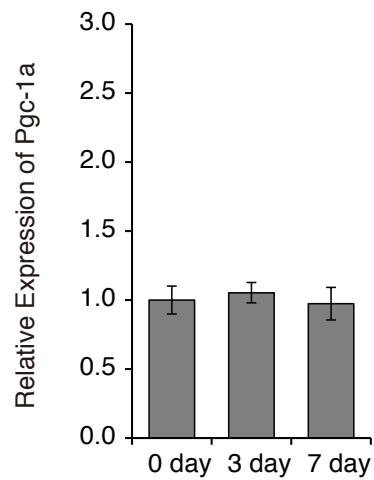

Supplementary Figure S8. Relative expression of the PGC-1 $\alpha$  gene after the administration of MgH<sub>2</sub> in wild type.

C57BL/6 mice were given 0.9 mg/kg MgH<sub>2</sub> for 3 and 7 days. Total RNA was prepared from the liver, the expression of the PGC-1 $\alpha$  gene was estimated by using quantitative RT-PCR analysis. Data are mean  $\pm$  SD (n=9).



Supplementary Table S1 Nucleotide sequences of primer sets and TaqMan probes.

| Gene               | Forward primer        | Reverse primer        | TaqMan probe                       |
|--------------------|-----------------------|-----------------------|------------------------------------|
| Mouse              |                       |                       |                                    |
| Ppargc1a           | ACCCTGCCATTGTTAAGACC  | CTGCTGCTGTTCTGTTTTTC  | CAACAGCAAAAGCCACAAAGACGTC          |
| Fgf21              | CCGCAGTCCAGAAAGTCTCCT | TCTGAAGCTGCAGGCCTCA   | AGCTCTCTATGGATCGCCTCACTTTGATC<br>C |
| Cpt1a              | CTATGCGCTACTCGCTGAAG  | AGACTCCAGGTACCTGCTCA  | CTGCCTGTCCCAGCTGTCAAAGAT           |
| Acox1              | TTGTCCCTATCCGTGAGATT  | AAACCATGGTCCCATATGTC  | AAGCCTCTGCCAGGCATCACTGTT           |
| Apoa2              | CTGCTGGTCACCATCTGTAG  | TAGTTCCTGCTGACCTGACA  | CCAGGCCAAGGCATACTTTGAGAAG          |
| Aldh1a1            | ATGGTTTAGCAGCAGGACTC  | AAAGACCATGTTACCCAGT   | TGCCCTTCGGTGGATTCAA                |
| Ppara              | TTCAGAAGAAGAACC GGAAC | CTTTCAGGTCGTGTTACACAG | CGGGATGTCACACAATGCAATTTCGC         |
| Acaa1a             | GCATCCCAGAGACTGTACCT  | GTCATCCCCATAGGAGTCAG  | TGCTGGAGAGTGAGAAAGCCAGAGA          |
| GAPDH              | CATCACTGCCACCCAGAAGA  | ATGTTCTGGGCAGCC       | TGGATGGCCCCTCTGGAAAGCTG            |
| Human (HepG2 cell) |                       |                       |                                    |
| Pgc1a              | GATGGCCTGTTTGATGACAG  | TTTGGGTGGTGACACAGAAT  | TACCCTTGGGATGGCACGCA               |
| GAPDH              | GGGAAGGTGAAGGTCGGA    | GCAGCCCTGGTGACCAG     | CAACGGATTTGGTCGTATTGGGCG           |

Complementary DNA was generated by SuperScript II Reverse Transcriptase (Invitrogen, Waltham, MA, USA) from RNA samples that were used for microarray analysis. cDNA was analyzed by quantitative PCR using Thermal Cycler Dice Real Time System TP800 (TAKARA BIO INC., Otsu, Shiga, Japan). All samples were normalized to glyceraldehyde 3-phosphate dehydrogenase (GAPDH) expression. Primer and probe sequences for each PCR are shown.
